# Supplementary material for: Chemical and Physical Defense Traits in Two Sexual Forms of Opuntia robusta in Central Eastern Mexico
Source: PLoS One. 2014 Mar 5;9(3):e89535. doi: 10.1371/journal.pone.0089535 (PMC3943789; doi:10.1371/journal.pone.0089535)
Supplement: Table S6 — Average spine physical traits per cladode. (XLSX) [file pone.0089535.s007.xlsx]

## Sheet: SpineTratesPerCladode
Status description	Status abbreviation	Status code	Sex	Sex code	Parental state	Reproductive state	Plant code ordered within a plant	Cladode code within a plant	Average spine length	Average spine nr per cladode	Average spine nr per areola per cladode	Average areolae nr per cladode
Comparison of empty cladodes	E	1	Female	1	0	0	1	1	24.72	128	16	8
Comparison of empty cladodes	E	1	Female	1	0	0	1	2	30.42	113	14.125	8
Comparison of empty cladodes	E	1	Female	1	0	0	1	3	29.12	110	12.222	9
Comparison of empty cladodes	E	1	Female	1	0	0	6	1	29.39	66	11	6
Comparison of empty cladodes	E	1	Female	1	0	0	6	2	27.65	75	10.714	7
Comparison of empty cladodes	E	1	Female	1	0	0	6	3	29.15	68	9.714	7
Comparison of empty cladodes	E	1	Female	1	0	0	10	1	26.87	98	12.25	8
Comparison of empty cladodes	E	1	Female	1	0	0	10	2	24.89	84	10.5	8
Comparison of empty cladodes	E	1	Female	1	0	0	10	3	23.69	99	14.143	7
Comparison of empty cladodes	E	1	Female	1	0	0	11	1	25.83	80	10	8
Comparison of empty cladodes	E	1	Female	1	0	0	11	2	27.21	106	13.25	8
Comparison of empty cladodes	E	1	Female	1	0	0	11	3	33.17	53	6.625	8
Comparison of empty cladodes	E	1	Female	1	0	0	12	1	27.42	72	10.286	7
Comparison of empty cladodes	E	1	Female	1	0	0	12	2	26.55	47	6.714	7
Comparison of empty cladodes	E	1	Female	1	0	0	12	3	22.64	42	7	6
Comparison of empty cladodes	E	1	Female	1	0	0	13	1	23.56	79	11.286	7
Comparison of empty cladodes	E	1	Female	1	0	0	13	2	20.35	74	10.571	7
Comparison of empty cladodes	E	1	Female	1	0	0	13	3	26.79	81	13.5	6
Comparison of empty cladodes	E	1	Female	1	0	0	14	1	24.83	77	11	7
Comparison of empty cladodes	E	1	Female	1	0	0	14	2	18.67	42	5.25	8
Comparison of empty cladodes	E	1	Female	1	0	0	14	3	24.16	45	6.429	7
Comparison of empty cladodes	E	1	Hermaphrodite	2	0	0	7	1	27	101	8.417	12
Comparison of empty cladodes	E	1	Hermaphrodite	2	0	0	7	2	23.38	117	8.357	14
Comparison of empty cladodes	E	1	Hermaphrodite	2	0	0	7	3	29.45	163	12.538	13
Comparison of empty cladodes	E	1	Hermaphrodite	2	0	0	8	1	26.22	186	20.667	9
Comparison of empty cladodes	E	1	Hermaphrodite	2	0	0	8	2	22.29	69	9.857	7
Comparison of empty cladodes	E	1	Hermaphrodite	2	0	0	8	3	25.02	95	11.875	8
Comparison of empty cladodes	E	1	Hermaphrodite	2	0	0	9	1	27.93	72	9	8
Comparison of empty cladodes	E	1	Hermaphrodite	2	0	0	9	2	25.44	64	8	8
Comparison of empty cladodes	E	1	Hermaphrodite	2	0	0	9	3	26.17	54	6	9
Comparison of empty cladodes	E	1	Hermaphrodite	2	0	0	13	1	29.74	113	14.125	8
Comparison of empty cladodes	E	1	Hermaphrodite	2	0	0	13	2	25.16	129	14.333	9
Comparison of empty cladodes	E	1	Hermaphrodite	2	0	0	13	3	27.41	63	7.875	8
Comparison of empty cladodes	E	1	Hermaphrodite	2	0	0	22	1	15.62	77	9.625	8
Comparison of empty cladodes	E	1	Hermaphrodite	2	0	0	22	2	27.82	40	5.714	7
Comparison of empty cladodes	E	1	Hermaphrodite	2	0	0	22	3	27.84	89	9.889	9
Comparison of empty cladodes	E	1	Hermaphrodite	2	0	0	23	1	29.93	91	11.375	8
Comparison of empty cladodes	E	1	Hermaphrodite	2	0	0	23	2	26.99	103	12.875	8
Comparison of empty cladodes	E	1	Hermaphrodite	2	0	0	23	3	19.06	84	9.333	9
Comparison of empty cladodes	E	1	Hermaphrodite	2	0	0	24	1	25.84	52	6.5	8
Comparison of empty cladodes	E	1	Hermaphrodite	2	0	0	24	2	27.77	77	9.625	8
Comparison of empty cladodes	E	1	Hermaphrodite	2	0	0	24	3	29.92	96	12	8
Comparison of empty cladodes	E	1	Hermaphrodite	2	0	0	25	1	26.8	87	10.875	8
Comparison of empty cladodes	E	1	Hermaphrodite	2	0	0	25	2	29.25	91	10.111	9
Comparison of empty cladodes	E	1	Hermaphrodite	2	0	0	25	3	28.95	63	9	7
Comparison of empty cladodes	E	1	Hermaphrodite	2	0	0	26	1	25.35	57	8.143	7
Comparison of empty cladodes	E	1	Hermaphrodite	2	0	0	26	2	27.59	88	11	8
Comparison of empty cladodes	E	1	Hermaphrodite	2	0	0	26	3	23.32	81	11.571	7
Comparison of empty cladodes	E	1	Hermaphrodite	2	0	0	28	1	23.1	122	15.25	8
Comparison of empty cladodes	E	1	Hermaphrodite	2	0	0	28	2	26.29	88	12.571	7
Comparison of empty cladodes	E	1	Hermaphrodite	2	0	0	28	3	26.08	105	13.125	8
Comparison of empty cladodes	E	1	Hermaphrodite	2	0	0	29	1	29.64	80	10	8
Comparison of empty cladodes	E	1	Hermaphrodite	2	0	0	29	2	27.68	59	8.429	7
Comparison of empty cladodes	E	1	Hermaphrodite	2	0	0	29	3	24.53	75	10.714	7
Comparison of empty cladodes	E	1	Hermaphrodite	2	0	0	30	1	22.98	118	16.857	7
Comparison of empty cladodes	E	1	Hermaphrodite	2	0	0	30	2	23.28	162	23.143	7
Comparison of empty cladodes	E	1	Hermaphrodite	2	0	0	30	3	28.92	134	22.333	6
Comparison of empty cladodes	E	1	Hermaphrodite	2	0	0	32	1	17.44	53	8.833	6
Comparison of empty cladodes	E	1	Hermaphrodite	2	0	0	32	2	27.73	41	4.556	9
Comparison of empty cladodes	E	1	Hermaphrodite	2	0	0	32	3	28	80	8.889	9
Comparison of empty cladodes	E	1	Hermaphrodite	2	0	0	33	1	28.62	88	12.571	7
Comparison of empty cladodes	E	1	Hermaphrodite	2	0	0	33	2	24.31	86	12.286	7
Comparison of empty cladodes	E	1	Hermaphrodite	2	0	0	33	3	26.66	131	18.714	7
Comparison of empty cladodes	E	1	Hermaphrodite	2	0	0	40	1	27.41	69	8.625	8
Comparison of empty cladodes	E	1	Hermaphrodite	2	0	0	40	2	25.58	92	13.143	7
Comparison of empty cladodes	E	1	Hermaphrodite	2	0	0	40	3	26.81	78	11.143	7
Comparison of empty cladodes	E	1	Hermaphrodite	2	0	0	42	1	23.66	26	2.889	9
Comparison of empty cladodes	E	1	Hermaphrodite	2	0	0	42	2	24.7	77	11	7
Comparison of empty cladodes	E	1	Hermaphrodite	2	0	0	42	3	26.24	100	12.5	8
Comparison of empty cladodes	E	1	Hermaphrodite	2	0	0	43	1	27.38	97	13.857	7
Comparison of empty cladodes	E	1	Hermaphrodite	2	0	0	43	2	26.96	56	8	7
Comparison of empty cladodes	E	1	Hermaphrodite	2	0	0	43	3	25.7	71	8.875	8
Comparison of empty cladodes	E	1	Hermaphrodite	2	0	0	44	1	28.16	105	15	7
Comparison of empty cladodes	E	1	Hermaphrodite	2	0	0	44	2	28.23	99	16.5	6
Comparison of empty cladodes	E	1	Hermaphrodite	2	0	0	44	3	23.29	110	13.75	8
Comparison of empty cladodes	E	1	Hermaphrodite	2	0	0	45	1	26.45	70	8.75	8
Comparison of empty cladodes	E	1	Hermaphrodite	2	0	0	45	2	16.39	114	16.286	7
Comparison of empty cladodes	E	1	Hermaphrodite	2	0	0	45	3	20.29	28	4.667	6
Comparison of empty cladodes	E	1	Hermaphrodite	2	0	0	46	1	26.07	34	4.857	7
Comparison of empty cladodes	E	1	Hermaphrodite	2	0	0	46	2	28.63	94	11.75	8
Comparison of empty cladodes	E	1	Hermaphrodite	2	0	0	46	3	27.12	97	13.857	7
Comparison of empty cladodes	E	1	Hermaphrodite	2	0	0	47	1	29.01	115	16.429	7
Comparison of empty cladodes	E	1	Hermaphrodite	2	0	0	47	2	25.01	93	11.625	8
Comparison of empty cladodes	E	1	Hermaphrodite	2	0	0	47	3	25.65	78	11.143	7
Comparison of empty cladodes	E	1	Hermaphrodite	2	0	0	48	1	25.37	85	12.143	7
Comparison of empty cladodes	E	1	Hermaphrodite	2	0	0	48	2	25.1	83	11.857	7
Comparison of empty cladodes	E	1	Hermaphrodite	2	0	0	48	3	24.08	88	12.571	7
Comparison of empty cladodes	E	1	Hermaphrodite	2	0	0	49	1	16.51	60	10	6
Comparison of empty cladodes	E	1	Hermaphrodite	2	0	0	49	2	27.01	45	5.625	8
Comparison of empty cladodes	E	1	Hermaphrodite	2	0	0	49	3	24.62	71	10.143	7
Comparison of empty cladodes	E	1	Hermaphrodite	2	0	0	51	1	27.35	71	8.875	8
Comparison of empty cladodes	E	1	Hermaphrodite	2	0	0	51	2	23.78	72	10.286	7
Comparison of empty cladodes	E	1	Hermaphrodite	2	0	0	51	3	23.83	108	15.429	7
Comparison of empty cladodes	E	1	Hermaphrodite	2	0	0	52	1	30.76	42	7	6
Comparison of empty cladodes	E	1	Hermaphrodite	2	0	0	52	2	17.32	72	10.286	7
Comparison of empty cladodes	E	1	Hermaphrodite	2	0	0	52	3	29.52	37	4.625	8
Comparison of empty cladodes	E	1	Hermaphrodite	2	0	0	55	1	26.87	63	7	9
Comparison of empty cladodes	E	1	Hermaphrodite	2	0	0	55	2	26.36	136	22.667	6
Comparison of empty cladodes	E	1	Hermaphrodite	2	0	0	55	3	29.31	89	12.714	7
Comparison of parental and empty cladodes	PE	2	Female	1	1	0	5	1	25.14	29	3.222	9
Comparison of parental and empty cladodes	PE	2	Female	1	0	0	5	2	21.27	15	1.875	8
Comparison of parental and empty cladodes	PE	2	Female	1	0	0	5	3	22.74	19	2.111	9
Comparison of parental and empty cladodes	PE	2	Female	1	0	0	8	1	22.06	54	6.75	8
Comparison of parental and empty cladodes	PE	2	Female	1	1	0	8	2	27.8	84	12	7
Comparison of parental and empty cladodes	PE	2	Female	1	0	0	8	3	26.9	105	13.125	8
Comparison of parental and empty cladodes	PE	2	Hermaphrodite	2	0	0	6	1	32.28	158	11.286	14
Comparison of parental and empty cladodes	PE	2	Hermaphrodite	2	1	0	6	2	30.33	101	9.182	11
Comparison of parental and empty cladodes	PE	2	Hermaphrodite	2	0	0	6	3	20.17	60	5	12
Comparison of parental and empty cladodes	PE	2	Hermaphrodite	2	0	0	38	1	25.33	99	14.143	7
Comparison of parental and empty cladodes	PE	2	Hermaphrodite	2	1	0	38	2	18.12	87	10.875	8
Comparison of parental and empty cladodes	PE	2	Hermaphrodite	2	0	0	38	3	25.57	40	5	8
Comparison of parental and empty cladodes	PE	2	Hermaphrodite	2	0	0	41	1	23.12	86	10.75	8
Comparison of parental and empty cladodes	PE	2	Hermaphrodite	2	1	0	41	2	24.38	17	2.125	8
Comparison of parental and empty cladodes	PE	2	Hermaphrodite	2	0	0	41	3	25.46	26	3.25	8
Comparison of reproductive and empty cladodes	RE	3	Female	1	0	1	2	1	24.59	117	13	9
Comparison of reproductive and empty cladodes	RE	3	Female	1	0	0	2	2	26.39	83	9.222	9
Comparison of reproductive and empty cladodes	RE	3	Female	1	0	0	2	3	27.9	63	9	7
Comparison of reproductive and empty cladodes	RE	3	Female	1	0	1	3	1	25.38	76	8.444	9
Comparison of reproductive and empty cladodes	RE	3	Female	1	0	0	3	2	25.74	86	9.556	9
Comparison of reproductive and empty cladodes	RE	3	Female	1	0	0	3	3	22.68	38	4.222	9
Comparison of reproductive and empty cladodes	RE	3	Female	1	0	1	4	1	25.29	72	9	8
Comparison of reproductive and empty cladodes	RE	3	Female	1	0	1	4	2	23.66	83	9.222	9
Comparison of reproductive and empty cladodes	RE	3	Female	1	0	0	4	3	19.39	56	7	8
Comparison of reproductive and empty cladodes	RE	3	Female	1	0	0	7	1	29.32	41	5.125	8
Comparison of reproductive and empty cladodes	RE	3	Female	1	0	1	7	2	29.73	22	2.75	8
Comparison of reproductive and empty cladodes	RE	3	Female	1	0	0	7	3	31.7	33	4.125	8
Comparison of reproductive and empty cladodes	RE	3	Female	1	0	1	9	1	31.09	22	2.75	8
Comparison of reproductive and empty cladodes	RE	3	Female	1	0	0	9	2	29.93	45	5	9
Comparison of reproductive and empty cladodes	RE	3	Female	1	0	0	9	3	32.47	101	14.429	7
Comparison of reproductive and empty cladodes	RE	3	Female	1	0	1	16	1	22.68	63	7.875	8
Comparison of reproductive and empty cladodes	RE	3	Female	1	0	0	16	2	29.99	94	11.75	8
Comparison of reproductive and empty cladodes	RE	3	Female	1	0	0	16	3	27.78	99	12.375	8
Comparison of reproductive and empty cladodes	RE	3	Female	1	0	1	17	1	24.07	84	9.333	9
Comparison of reproductive and empty cladodes	RE	3	Female	1	0	1	17	2	24.48	58	6.444	9
Comparison of reproductive and empty cladodes	RE	3	Female	1	0	0	17	3	16.66	50	4.167	12
Comparison of reproductive and empty cladodes	RE	3	Hermaphrodite	2	0	1	1	1	17.04	53	6.625	8
Comparison of reproductive and empty cladodes	RE	3	Hermaphrodite	2	0	0	1	2	25.24	66	6.6	10
Comparison of reproductive and empty cladodes	RE	3	Hermaphrodite	2	0	0	1	3	17.8	35	3.889	9
Comparison of reproductive and empty cladodes	RE	3	Hermaphrodite	2	0	1	2	1	23.96	135	15	9
Comparison of reproductive and empty cladodes	RE	3	Hermaphrodite	2	0	0	2	2	25.74	151	15.1	10
Comparison of reproductive and empty cladodes	RE	3	Hermaphrodite	2	0	0	2	3	30.72	54	6.75	8
Comparison of reproductive and empty cladodes	RE	3	Hermaphrodite	2	0	1	3	1	28.39	72	8	9
Comparison of reproductive and empty cladodes	RE	3	Hermaphrodite	2	0	1	3	2	22.52	63	7.875	8
Comparison of reproductive and empty cladodes	RE	3	Hermaphrodite	2	0	0	3	3	26.35	92	11.5	8
Comparison of reproductive and empty cladodes	RE	3	Hermaphrodite	2	0	0	4	1	27.03	94	11.75	8
Comparison of reproductive and empty cladodes	RE	3	Hermaphrodite	2	0	1	4	2	24.36	88	11	8
Comparison of reproductive and empty cladodes	RE	3	Hermaphrodite	2	0	0	4	3	15.42	36	4	9
Comparison of reproductive and empty cladodes	RE	3	Hermaphrodite	2	0	0	5	1	26.87	179	13.769	13
Comparison of reproductive and empty cladodes	RE	3	Hermaphrodite	2	0	1	5	2	26.91	203	14.5	14
Comparison of reproductive and empty cladodes	RE	3	Hermaphrodite	2	0	0	5	3	28.25	173	15.727	11
Comparison of reproductive and empty cladodes	RE	3	Hermaphrodite	2	0	0	10	1	14.23	60	5.455	11
Comparison of reproductive and empty cladodes	RE	3	Hermaphrodite	2	0	0	10	2	25.28	95	9.5	10
Comparison of reproductive and empty cladodes	RE	3	Hermaphrodite	2	0	1	10	3	20.63	109	10.9	10
Comparison of reproductive and empty cladodes	RE	3	Hermaphrodite	2	0	0	11	1	27.72	80	7.273	11
Comparison of reproductive and empty cladodes	RE	3	Hermaphrodite	2	0	1	11	2	21.49	123	13.667	9
Comparison of reproductive and empty cladodes	RE	3	Hermaphrodite	2	0	0	11	3	27.45	74	9.25	8
Comparison of reproductive and empty cladodes	RE	3	Hermaphrodite	2	0	0	12	1	23.99	69	8.625	8
Comparison of reproductive and empty cladodes	RE	3	Hermaphrodite	2	0	1	12	2	23.82	71	7.889	9
Comparison of reproductive and empty cladodes	RE	3	Hermaphrodite	2	0	0	12	3	25.91	78	7.8	10
Comparison of reproductive and empty cladodes	RE	3	Hermaphrodite	2	0	0	14	1	21.08	88	9.778	9
Comparison of reproductive and empty cladodes	RE	3	Hermaphrodite	2	0	1	14	2	25.03	66	7.333	9
Comparison of reproductive and empty cladodes	RE	3	Hermaphrodite	2	0	1	14	3	26.38	104	13	8
Comparison of reproductive and empty cladodes	RE	3	Hermaphrodite	2	0	0	15	1	25.02	87	9.667	9
Comparison of reproductive and empty cladodes	RE	3	Hermaphrodite	2	0	1	15	2	28.27	122	13.556	9
Comparison of reproductive and empty cladodes	RE	3	Hermaphrodite	2	0	0	15	3	25.72	77	9.625	8
Comparison of reproductive and empty cladodes	RE	3	Hermaphrodite	2	0	0	16	1	26	120	15	8
Comparison of reproductive and empty cladodes	RE	3	Hermaphrodite	2	0	1	16	2	27.25	80	10	8
Comparison of reproductive and empty cladodes	RE	3	Hermaphrodite	2	0	0	16	3	26.61	73	10.429	7
Comparison of reproductive and empty cladodes	RE	3	Hermaphrodite	2	0	0	17	1	21.13	74	8.222	9
Comparison of reproductive and empty cladodes	RE	3	Hermaphrodite	2	0	1	17	2	15.44	63	7	9
Comparison of reproductive and empty cladodes	RE	3	Hermaphrodite	2	0	1	17	3	27.1	27	3.857	7
Comparison of reproductive and empty cladodes	RE	3	Hermaphrodite	2	0	1	18	1	24.54	97	12.125	8
Comparison of reproductive and empty cladodes	RE	3	Hermaphrodite	2	0	0	18	2	27.82	127	14.111	9
Comparison of reproductive and empty cladodes	RE	3	Hermaphrodite	2	0	0	18	3	29.67	56	8	7
Comparison of reproductive and empty cladodes	RE	3	Hermaphrodite	2	0	1	20	1	27.45	82	11.714	7
Comparison of reproductive and empty cladodes	RE	3	Hermaphrodite	2	0	0	20	2	24.95	84	10.5	8
Comparison of reproductive and empty cladodes	RE	3	Hermaphrodite	2	0	0	20	3	28.46	131	16.375	8
Comparison of reproductive and empty cladodes	RE	3	Hermaphrodite	2	0	1	21	1	28.95	102	17	6
Comparison of reproductive and empty cladodes	RE	3	Hermaphrodite	2	0	0	21	2	25.68	104	14.857	7
Comparison of reproductive and empty cladodes	RE	3	Hermaphrodite	2	0	0	21	3	24.66	81	10.125	8
Comparison of reproductive and empty cladodes	RE	3	Hermaphrodite	2	0	0	27	1	24.88	74	10.571	7
Comparison of reproductive and empty cladodes	RE	3	Hermaphrodite	2	0	1	27	2	26.55	136	19.429	7
Comparison of reproductive and empty cladodes	RE	3	Hermaphrodite	2	0	0	27	3	25.12	114	14.25	8
Comparison of reproductive and empty cladodes	RE	3	Hermaphrodite	2	0	1	31	1	25.83	106	17.667	6
Comparison of reproductive and empty cladodes	RE	3	Hermaphrodite	2	0	0	31	2	16.03	90	12.857	7
Comparison of reproductive and empty cladodes	RE	3	Hermaphrodite	2	0	0	31	3	29.45	37	5.286	7
Comparison of reproductive and empty cladodes	RE	3	Hermaphrodite	2	0	1	34	1	25.72	106	13.25	8
Comparison of reproductive and empty cladodes	RE	3	Hermaphrodite	2	0	0	34	2	28.99	64	10.667	6
Comparison of reproductive and empty cladodes	RE	3	Hermaphrodite	2	0	0	34	3	25.76	70	8.75	8
Comparison of reproductive and empty cladodes	RE	3	Hermaphrodite	2	0	1	35	1	28.2	91	11.375	8
Comparison of reproductive and empty cladodes	RE	3	Hermaphrodite	2	0	0	35	2	27.24	68	9.714	7
Comparison of reproductive and empty cladodes	RE	3	Hermaphrodite	2	0	1	35	3	25.22	58	8.286	7
Comparison of reproductive and empty cladodes	RE	3	Hermaphrodite	2	0	0	36	1	25.6	73	9.125	8
Comparison of reproductive and empty cladodes	RE	3	Hermaphrodite	2	0	1	36	2	26.09	75	10.714	7
Comparison of reproductive and empty cladodes	RE	3	Hermaphrodite	2	0	0	36	3	27.16	53	7.571	7
Comparison of reproductive and empty cladodes	RE	3	Hermaphrodite	2	0	0	37	1	26.95	70	10	7
Comparison of reproductive and empty cladodes	RE	3	Hermaphrodite	2	0	1	37	2	27.86	100	14.286	7
Comparison of reproductive and empty cladodes	RE	3	Hermaphrodite	2	0	0	37	3	27.93	73	10.429	7
Comparison of reproductive and empty cladodes	RE	3	Hermaphrodite	2	0	0	39	1	22.11	51	6.375	8
Comparison of reproductive and empty cladodes	RE	3	Hermaphrodite	2	0	0	39	2	21.31	64	8	8
Comparison of reproductive and empty cladodes	RE	3	Hermaphrodite	2	0	1	39	3	21.57	54	7.714	7
Comparison of reproductive and empty cladodes	RE	3	Hermaphrodite	2	0	1	50	1	29.55	73	9.125	8
Comparison of reproductive and empty cladodes	RE	3	Hermaphrodite	2	0	0	50	2	24.13	74	10.571	7
Comparison of reproductive and empty cladodes	RE	3	Hermaphrodite	2	0	0	50	3	20.45	97	16.167	6
Comparison of reproductive and empty cladodes	RE	3	Hermaphrodite	2	0	1	54	1	29.85	44	4.889	9
Comparison of reproductive and empty cladodes	RE	3	Hermaphrodite	2	0	1	54	2	24.54	85	10.625	8
Comparison of reproductive and empty cladodes	RE	3	Hermaphrodite	2	0	1	54	3	24.27	68	9.714	7
Comparison of reproductive and empty cladodes	RE	3	Hermaphrodite	2	0	0	56	1	30.96	99	14.143	7
Comparison of reproductive and empty cladodes	RE	3	Hermaphrodite	2	0	1	56	2	29.78	84	12	7
Comparison of reproductive and empty cladodes	RE	3	Hermaphrodite	2	0	0	56	3	29.46	92	13.143	7
Comparison of reproductive and empty cladodes	RE	3	Hermaphrodite	2	0	0	57	1	16.57	133	16.625	8
Comparison of reproductive and empty cladodes	RE	3	Hermaphrodite	2	0	1	57	2	28	21	3	7
Comparison of reproductive and empty cladodes	RE	3	Hermaphrodite	2	0	1	57	3	30.48	75	9.375	8
Comparison of reproductive and empty cladodes	RE	3	Hermaphrodite	2	0	1	58	1	18.16	81	11.571	7
Comparison of reproductive and empty cladodes	RE	3	Hermaphrodite	2	0	1	58	2	20.41	57	8.143	7
Comparison of reproductive and empty cladodes	RE	3	Hermaphrodite	2	0	1	58	3	17.8	46	5.75	8
Comparison of reproductive and empty cladodes	RE	3	Hermaphrodite	2	0	1	59	1	26.52	44	6.286	7
Comparison of reproductive and empty cladodes	RE	3	Hermaphrodite	2	0	0	59	2	24.64	90	12.857	7
Comparison of reproductive and empty cladodes	RE	3	Hermaphrodite	2	0	1	59	3	25.59	120	17.143	7
Parental, reproductive and empty cladodes	RPE (not analyzed)	4	Female	1	1	0	15	1	29.53	68	7.556	9
Parental, reproductive and empty cladodes	RPE (not analyzed)	4	Female	1	0	0	15	2	24.8	80	8.889	9
Parental, reproductive and empty cladodes	RPE (not analyzed)	4	Female	1	0	1	15	3	27.9	60	7.5	8
Parental, reproductive and empty cladodes	RPE (not analyzed)	4	Hermaphrodite	2	0	1	19	1	27.73	78	11.143	7
Parental, reproductive and empty cladodes	RPE (not analyzed)	4	Hermaphrodite	2	1	0	19	2	27.64	88	11	8
Parental, reproductive and empty cladodes	RPE (not analyzed)	4	Hermaphrodite	2	0	0	19	3	28.21	112	14	8
Empty and simultaneously parental/reproductive cladodes	not analyzed	5	Hermaphrodite	2	0	0	53	1	22.82	61	8.714	7
Empty and simultaneously parental/reproductive cladodes	not analyzed	5	Hermaphrodite	2	1	1	53	2	26.3	170	24.286	7
Empty and simultaneously parental/reproductive cladodes	not analyzed	5	Hermaphrodite	2	0	0	53	3	17.68	139	17.375	8

## Sheet: ReadMe
Spine traits per cladode for hermaphrodites and females
Comparison were made per cladode
Spine traits considered in the analysis: average spine number per areola, average spine length per areola, average no of areolas per cladode (counted on the imaginary cross traced on the cladode).
Average no of spines per cladode (column K) was not analyzed
We compared the average of a spine physical trait between sexual forms and among cladode states (mentioned in the column A) per cladode
We considered the factor “Plant” nested in the factor “Sex” a random effect and the remaining factors as fixed effects
