# Supplementary material for: Chemical and Physical Defense Traits in Two Sexual Forms of Opuntia robusta in Central Eastern Mexico
Source: PLoS One. 2014 Mar 5;9(3):e89535. doi: 10.1371/journal.pone.0089535 (PMC3943789; doi:10.1371/journal.pone.0089535)
Supplement: Table S7 — Average spine length per plant. (XLSX) [file pone.0089535.s008.xlsx]

## Sheet: AverageSpineLengthPerPlant
Sex	Sex code	Plant code ordered within sex	Average spine length [mm]
Female	1	2	27.934
Female	1	13	25.951
Female	1	27	25.025
Female	1	38	23.085
Female	1	51	23.492
Female	1	58	28.689
Female	1	61	30.229
Female	1	64	26.136
Female	1	70	31.607
Female	1	74	25.157
Female	1	84	28.067
Female	1	85	25.919
Female	1	89	23.662
Female	1	93	23.067
Female	1	95	27.24
Female	1	101	27.336
Female	1	104	22.266
Hermaphrodite	2	10	20.727
Hermaphrodite	2	12	25.824
Hermaphrodite	2	14	25.934
Hermaphrodite	2	15	24.037
Hermaphrodite	2	16	27.312
Hermaphrodite	2	18	29.382
Hermaphrodite	2	19	26.937
Hermaphrodite	2	20	24.451
Hermaphrodite	2	22	26.589
Hermaphrodite	2	23	19.956
Hermaphrodite	2	24	25.917
Hermaphrodite	2	25	24.767
Hermaphrodite	2	26	27.975
Hermaphrodite	2	28	24.471
Hermaphrodite	2	30	26.072
Hermaphrodite	2	34	26.599
Hermaphrodite	2	36	23.406
Hermaphrodite	2	37	26.778
Hermaphrodite	2	39	27.833
Hermaphrodite	2	40	25.798
Hermaphrodite	2	41	26.679
Hermaphrodite	2	42	25.609
Hermaphrodite	2	44	26.531
Hermaphrodite	2	45	27.919
Hermaphrodite	2	46	28.114
Hermaphrodite	2	47	25.481
Hermaphrodite	2	48	25.47
Hermaphrodite	2	49	25.158
Hermaphrodite	2	50	26.663
Hermaphrodite	2	54	24.644
Hermaphrodite	2	57	24.883
Hermaphrodite	2	59	25.823
Hermaphrodite	2	60	26.226
Hermaphrodite	2	62	26.751
Hermaphrodite	2	63	26.827
Hermaphrodite	2	65	26.283
Hermaphrodite	2	67	27.551
Hermaphrodite	2	69	23.781
Hermaphrodite	2	73	21.679
Hermaphrodite	2	75	26.652
Hermaphrodite	2	76	24.478
Hermaphrodite	2	77	24.953
Hermaphrodite	2	78	26.487
Hermaphrodite	2	80	26.719
Hermaphrodite	2	81	23.659
Hermaphrodite	2	82	27.278
Hermaphrodite	2	83	26.676
Hermaphrodite	2	86	24.935
Hermaphrodite	2	87	23.587
Hermaphrodite	2	88	24.711
Hermaphrodite	2	90	24.946
Hermaphrodite	2	91	27.394
Hermaphrodite	2	92	23.55
Hermaphrodite	2	96	26.551
Hermaphrodite	2	97	27.478
Hermaphrodite	2	98	29.964
Hermaphrodite	2	99	27.775
Hermaphrodite	2	100	18.755
Hermaphrodite	2	103	25.486

## Sheet: ReadMe
Average spine length per cladode, per plant.
Plants were repetitions in the analysis
